# Supplementary material
Source: MDPI journal article supplement (https://www.mdpi.com/2077-0472/12/12/2026)
Supplement: s1 [file s1]

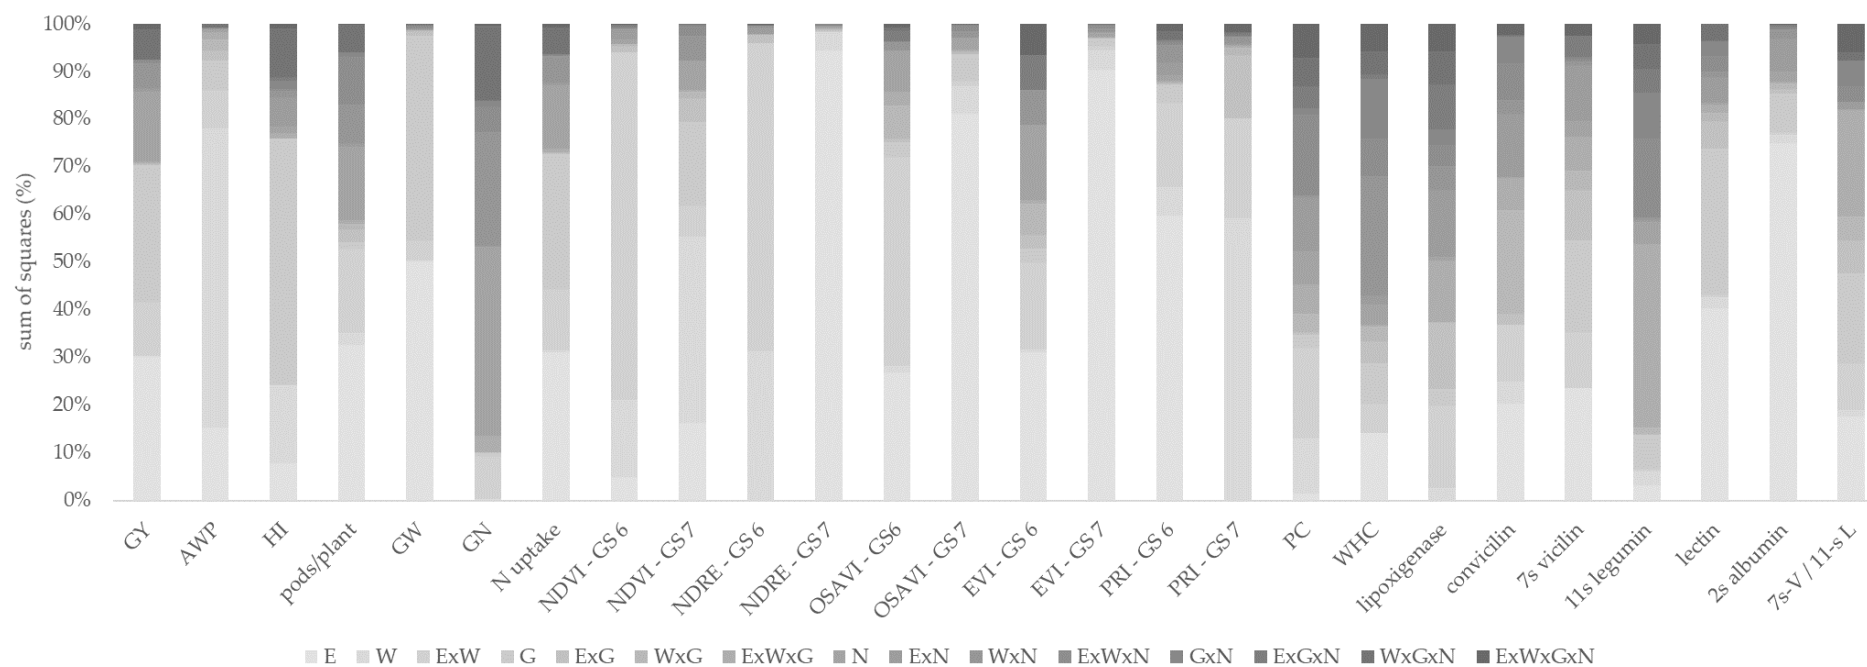

**Figure S1.** Percentage of the sum of squares (SS) explained by the factors included in the ANOVA model for agronomic and quality traits.

**Table S1.** Mean data (+ standard error) of agronomic performance, vegetation indexes and protein quality of two chickpea genotypes (G1, Pascia; G2, Sultano) grown under rainfed (-I) and with supplementary irrigation (+I) and two N rates (-N, +N) at Troia (S1) and Pignola (S2).

| E  | W  | G  | N     | GY    | AWP   | WUE   | HI   | Pods    | GW  | GN   | PH   | Nupt  | NDVI | OSAVI |      | LAI  |      | PRI  |       | PC    | WHC  | lipox | conv | 7s-V | 11s-L | lect | 2s-Alb | 7s-V / 11s-L |      |
|----|----|----|-------|-------|-------|-------|------|---------|-----|------|------|-------|------|-------|------|------|------|------|-------|-------|------|-------|------|------|-------|------|--------|--------------|------|
|    |    |    | kg/ha | kg/ha | kg/mm | kg/mm | %    | #/plant | mg  | #/m2 | cm   | kg/ha | GS6  | GS7   | GS6  | GS7  | GS6  | GS7  | GS6   | GS7   | %    | g/g   | %    | %    | %     | %    | %      | -            |      |
| S1 | +I | G1 | -N    | 1379  | 6.4   | 4.0   | 55.7 | 20.0    | 380 | 3643 | 30.0 | 43.9  | 0.60 | 0.45  | 0.47 | 0.26 | 1.37 | 0.51 | -0.01 | -0.04 | 19.9 | 1.25  | 7.7  | 5.3  | 15.3  | 32.2 | 8.8    | 9.2          | 0.47 |
|    |    |    | +N    | 1723  | 8.0   | 5.0   | 50.1 | 27.3    | 349 | 4955 | 31.1 | 54.9  | 0.62 | 0.47  | 0.49 | 0.28 | 1.40 | 0.54 | -0.01 | -0.04 | 19.9 | 1.33  | 6.3  | 5.4  | 13.3  | 33.0 | 10.0   | 8.6          | 0.40 |
|    |    | G2 | -N    | 795   | 3.7   | 2.3   | 46.2 | 17.3    | 255 | 3139 | 35.3 | 25.7  | 0.56 | 0.46  | 0.46 | 0.28 | 1.29 | 0.58 | -0.02 | -0.03 | 20.2 | 1.26  | 7.2  | 5.2  | 18.8  | 31.9 | 6.9    | 10.3         | 0.59 |
|    |    |    | +N    | 1418  | 6.5   | 4.1   | 44.4 | 33.3    | 237 | 5969 | 37.0 | 45.1  | 0.60 | 0.49  | 0.47 | 0.30 | 1.33 | 0.61 | 0.00  | -0.03 | 19.9 | 1.28  | 7.3  | 4.5  | 16.8  | 24.9 | 5.7    | 9.7          | 0.70 |
|    | -I | G1 | -N    | 1303  | 29.2  | 4.5   | 46.7 | 22.8    | 311 | 4186 | 27.1 | 41.0  | 0.54 | 0.42  | 0.43 | 0.25 | 1.24 | 0.50 | -0.02 | -0.04 | 19.7 | 1.32  | 8.5  | 6.0  | 14.7  | 30.1 | 8.4    | 9.9          | 0.49 |
|    |    |    | +N    | 1382  | 31.0  | 4.8   | 49.5 | 23.2    | 328 | 4248 | 28.3 | 44.5  | 0.55 | 0.43  | 0.44 | 0.26 | 1.29 | 0.50 | -0.02 | -0.05 | 20.1 | 1.31  | 7.2  | 5.6  | 14.5  | 31.2 | 10.2   | 8.4          | 0.47 |
|    |    | G2 | -N    | 891   | 20.0  | 3.1   | 46.5 | 21.9    | 220 | 4066 | 31.3 | 28.4  | 0.51 | 0.44  | 0.36 | 0.26 | 1.02 | 0.53 | -0.01 | -0.04 | 20.0 | 1.31  | 7.1  | 6.2  | 16.4  | 32.3 | 6.9    | 10.8         | 0.51 |
|    |    |    | +N    | 780   | 17.5  | 2.7   | 37.6 | 18.8    | 224 | 3562 | 34.3 | 24.9  | 0.56 | 0.46  | 0.44 | 0.29 | 1.28 | 0.56 | -0.02 | -0.04 | 20.0 | 1.24  | 7.1  | 5.5  | 14.5  | 32.6 | 8.6    | 9.2          | 0.45 |
| S2 | +I | G1 | -N    | 1646  | 4.7   | 3.5   | 49.9 | 24.3    | 429 | 3829 | 45.1 | 52.3  | 0.46 | 0.48  | 0.32 | 0.36 | 0.91 | 0.93 | -0.04 | -0.03 | 19.8 | 1.23  | 7.9  | 5.3  | 13.5  | 30.4 | 10.1   | 6.4          | 0.45 |
|    |    |    | +N    | 1837  | 5.3   | 4.0   | 47.9 | 24.7    | 411 | 4470 | 46.0 | 58.7  | 0.45 | 0.52  | 0.35 | 0.40 | 0.94 | 1.01 | -0.05 | -0.03 | 20.0 | 1.31  | 7.2  | 5.4  | 13.7  | 31.7 | 10.7   | 6.7          | 0.43 |
|    |    | G2 | -N    | 846   | 2.4   | 1.8   | 43.0 | 24.9    | 328 | 2577 | 53.8 | 26.9  | 0.47 | 0.51  | 0.37 | 0.37 | 1.02 | 0.90 | -0.04 | -0.04 | 19.9 | 1.28  | 7.6  | 4.7  | 13.4  | 31.9 | 10.1   | 7.1          | 0.42 |
|    |    |    | +N    | 1673  | 4.8   | 3.6   | 44.1 | 30.4    | 344 | 4864 | 58.3 | 52.3  | 0.47 | 0.57  | 0.37 | 0.42 | 1.07 | 1.05 | -0.04 | -0.03 | 19.6 | 1.27  | 8.0  | 4.5  | 14.1  | 32.3 | 8.9    | 7.8          | 0.44 |
|    | -I | G1 | -N    | 1701  | 12.1  | 4.5   | 43.9 | 28.4    | 448 | 3785 | 45.0 | 56.0  | 0.61 | 0.43  | 0.43 | 0.34 | 0.96 | 0.84 | -0.02 | -0.05 | 20.6 | 1.27  | 5.2  | 3.4  | 14.8  | 34.2 | 11.1   | 7.7          | 0.43 |
|    |    |    | +N    | 2237  | 16.0  | 5.9   | 49.3 | 33.6    | 439 | 5079 | 43.7 | 70.1  | 0.61 | 0.40  | 0.48 | 0.32 | 1.40 | 0.81 | -0.03 | -0.04 | 19.6 | 1.26  | 7.2  | 5.1  | 14.0  | 32.5 | 10.1   | 7.3          | 0.43 |
|    |    | G2 | -N    | 1654  | 11.8  | 4.3   | 38.7 | 32.7    | 345 | 4522 | 52.5 | 54.2  | 0.63 | 0.48  | 0.39 | 0.37 | 1.03 | 0.88 | -0.02 | -0.05 | 20.5 | 1.24  | 7.5  | 5.1  | 14.0  | 31.5 | 10.0   | 7.3          | 0.44 |
|    |    |    | +N    | 1651  | 11.8  | 4.3   | 39.3 | 34.8    | 362 | 4559 | 51.5 | 53.5  | 0.62 | 0.48  | 0.42 | 0.37 | 1.06 | 0.89 | -0.03 | -0.05 | 20.3 | 1.26  | 7.6  | 5.6  | 15.7  | 29.3 | 9.4    | 7.8          | 0.54 |
|    |    |    | SE    | 107   | 0.9   | 0.3   | 1.9  | 2.4     | 14  | 270  | 1.5  | 3.5   | 0.03 | 0.02  | 0.04 | 0.02 | 0.13 | 0.04 | 0.01  | 0.00  | 0.2  | 0.02  | 0.3  | 0.2  | 0.5   | 1.0  | 1.0    | 2.6          | 0.02 |
